# Supplementary material for: Pressure-induced reconstructive phase transitions, polarization with metallicity, and enhanced hardness in antiperovskite MgCNi3
Source: Royal Society of Chemistry journal article supplement (doi:10.1039/d1cp02742e), 2021-01-01
Supplement: d1cp02742e1.pdf [file d1cp02742e1.pdf]

*Supplementary Information of*

**Pressure-induced Reconstructive Phase Transitions,  
Polarization with Metallicity, and Enhanced Hardness  
in Antiperovskite MgCNi<sub>3</sub>**

Yingqi Cui,<sup>1</sup> Hao Cheng,<sup>1,2</sup> Hao Tian,<sup>3,4,\*</sup> Chenggang Li,<sup>1</sup> Yanan Tang,<sup>1</sup> Ai-Jie Mao,<sup>2</sup>  
and Xiao-Yu Kuang<sup>2,\*</sup>

<sup>1</sup> *School of Physics and Electronic Engineering, Zhengzhou Normal University,  
Zhengzhou 450044, China*

<sup>2</sup> *Institute of Atomic and Molecular Physics, Sichuan University, Chengdu 610065,  
China*

<sup>3</sup> *National Laboratory of Solid State Microstructures and Collaborative Innovation  
Center of Advanced Microstructures, Department of Materials Science and  
Engineering, Nanjing University, Nanjing 210093, China*

<sup>4</sup> *Jiangsu Key Laboratory of Artificial Functional Materials, Nanjing University,  
Nanjing 210093, China*

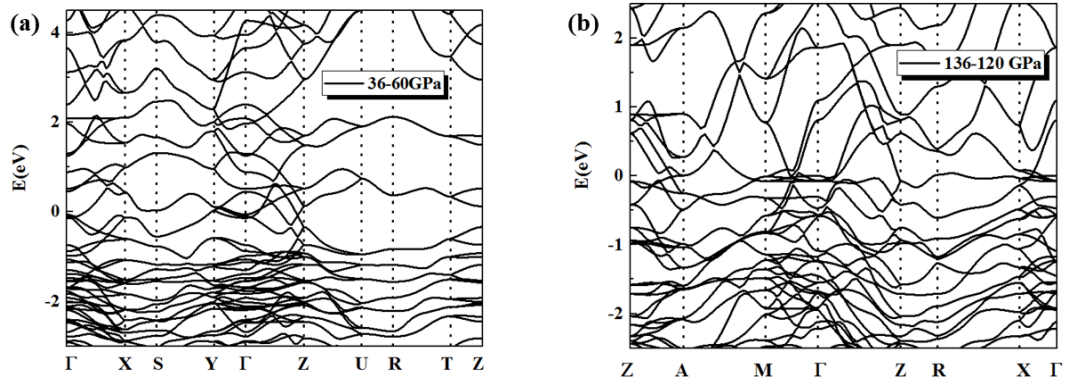

Figure S1. The energy band structures of two novel phases, i.e., (a)  $Cmc2_1$  phase at 60 GPa and (b)  $P4_2/mmm$  phase at 120 GPa. This figure indicates the two novel phases both exhibit metallicity.

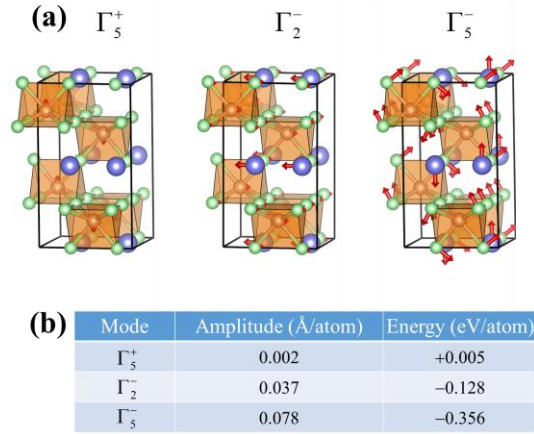

Figure S2. Schematization of the three distortions modes, i.e.,  $\Gamma_5^+$ ,  $\Gamma_2^-$ , and  $\Gamma_5^-$  modes, in the  $Cmc2_1$  phase of  $\text{MgCNi}_3$  with respect to its high-symmetry  $P6_3/mmc$  state, as well as their amplitudes and the changes of energy with respect to  $P6_3/mmc$  state. The red arrows represent the atomic displacements of the different distortion modes. Note that due to the rather small amplitude of  $\Gamma_5^+$  mode ( $< 0.002 \text{ \AA}/\text{atom}$ ), we will only consider the two main distortion in the main text ---  $\Gamma_2^-$ , and  $\Gamma_5^-$  modes.

Table S1. The relaxed lattice parameters and reduced atomic coordinates of MgCNi<sub>3</sub> (*Pm-3m*, *Cmc2<sub>1</sub>* and *P4<sub>2</sub>/mnm*).

|                                        | Atoms                                   | Wykc. | Coordinates |         |         |  |
|----------------------------------------|-----------------------------------------|-------|-------------|---------|---------|--|
|                                        |                                         |       | x           | y       | z       |  |
| <i>Pm-3m</i><br>(0 GPa)                | <i>a=b=c=3.7647Å</i>                    |       |             |         |         |  |
|                                        | Mg                                      | 1a    | 0           | 0       | 0       |  |
|                                        | C                                       | 1a    | 0.5         | 0.5     | 0.5     |  |
|                                        | Ni                                      | 3a    | 0           | 0.5     | 0.5     |  |
| <i>Cmc2<sub>1</sub></i><br>(60 GPa)    | <i>a= 4.5372Å, b=8.2622Å, c=4.5248Å</i> |       |             |         |         |  |
|                                        | Mg                                      | 4a    | 0.5867      | 0.25    | 0.83287 |  |
|                                        | C                                       | 4a    | 0.35446     | 0.25    | 0.432   |  |
|                                        | Ni1                                     | 4a    | 0.32523     | 0.25    | 0.00539 |  |
|                                        | Ni2                                     | 8b    | 0.68796     | 0.25    | 0.22055 |  |
| <i>P4<sub>2</sub>/mnm</i><br>(120 GPa) | <i>a=b=6.8991Å, c=3.1106Å</i>           |       |             |         |         |  |
|                                        | Mg                                      | 4g    | 0.1406      | 0.1406  | 0.5     |  |
|                                        | C                                       | 4g    | 0.57256     | 0.57256 | 0.5     |  |
|                                        | Ni1                                     | 8i    | 0.83775     | 0.51489 | 0.5     |  |
|                                        | Ni2                                     | 4f    | 0.68446     | 0.68446 | 0       |  |

Table S2. Elastic constants of MgCNi<sub>3</sub> different phases at different pressures. For the cubic phase with three independent terms of  $C_{11}$ ,  $C_{44}$  and  $C_{12}$ ; its mechanical stability criterion is<sup>[1]</sup>,  $C_{ii} > 0$  ( $i=1,4$ ),  $C_{11} > |C_{12}|$ ,  $(C_{11} + 2C_{12}) > 0$ . After careful inspection, the elastic constants of three phases we calculated meet the above requirements.

|                           | <b>P</b> | $C_{11}$ | $C_{22}$ | $C_{33}$ | $C_{44}$ | $C_{55}$ | $C_{66}$ | $C_{12}$ | $C_{13}$ | $C_{23}$ |
|---------------------------|----------|----------|----------|----------|----------|----------|----------|----------|----------|----------|
| <i>Pm-3m</i>              | 0        | 375      |          |          | 53       |          |          | 117      |          |          |
|                           | 10       | 440      |          |          | 59       |          |          | 134      |          |          |
|                           | 20       | 501      |          |          | 64       |          |          | 151      |          |          |
| <i>Cmc2<sub>1</sub></i>   | 30       | 506      | 442      | 358      | 152      | 98       | 130      | 195      | 230      | 289      |
|                           | 40       | 543      | 483      | 414      | 164      | 101      | 135      | 221      | 261      | 307      |
|                           | 50       | 582      | 521      | 463      | 176      | 105      | 142      | 245      | 285      | 328      |
|                           | 60       | 621      | 558      | 509      | 187      | 110      | 148      | 270      | 309      | 349      |
|                           | 70       | 659      | 593      | 554      | 198      | 113      | 153      | 295      | 331      | 368      |
|                           | 80       | 698      | 629      | 603      | 209      | 117      | 160      | 317      | 352      | 388      |
|                           | 90       | 734      | 663      | 645      | 219      | 120      | 165      | 341      | 373      | 408      |
| <i>P4<sub>2</sub>/mnm</i> | 100      | 823      |          | 648      | 304      | 304      | 133      | 263      | 423      |          |
|                           | 110      | 864      |          | 680      | 319      | 319      | 140      | 280      | 447      |          |
|                           | 120      | 904      |          | 709      | 334      | 334      | 145      | 296      | 470      |          |
|                           | 130      | 943      |          | 737      | 348      | 348      | 151      | 313      | 493      |          |
|                           | 140      | 981      |          | 765      | 362      | 362      | 156      | 329      | 516      |          |

[1]Wu Z, Zhao E, Xiang H, *et al. Phys. Rev. B*, 2007, 76(5): 054115.

Table S3. The Bulk modulus  $B$  (GPa), Shear modulus  $G$  (GPa), Young's modulus (GPa), Poisson's ratio of  $\text{MgCNi}_3$  different phases at different pressures  $P$  (GPa).

|            | $P$ | $B$     | $G$     | $B/G$ | $Y$     | $\sigma$ |
|------------|-----|---------|---------|-------|---------|----------|
| $Pm-3m$    | 0   | 202.884 | 76.438  | 2.654 | 203.729 | 0.333    |
|            | 10  | 236.267 | 87.323  | 2.706 | 233.234 | 0.335    |
|            | 20  | 267.701 | 97.489  | 2.746 | 260.807 | 0.338    |
| $Cmc2_1$   | 30  | 302.906 | 106.189 | 2.853 | 285.235 | 0.343    |
|            | 40  | 335.015 | 116.735 | 2.870 | 313.762 | 0.344    |
|            | 50  | 364.841 | 126.026 | 2.895 | 339.041 | 0.345    |
|            | 60  | 393.546 | 134.513 | 2.926 | 362.266 | 0.347    |
|            | 70  | 421.432 | 142.417 | 2.959 | 383.996 | 0.348    |
|            | 80  | 449.396 | 150.671 | 2.983 | 406.575 | 0.349    |
|            | 90  | 476.143 | 157.670 | 3.020 | 425.989 | 0.351    |
| $P4_2/mnm$ | 100 | 432.498 | 197.562 | 2.189 | 514.366 | 0.302    |
|            | 110 | 459.260 | 207.619 | 2.212 | 541.289 | 0.304    |
|            | 120 | 484.595 | 216.376 | 2.240 | 565.031 | 0.306    |
|            | 130 | 522.905 | 227.203 | 2.301 | 595.378 | 0.310    |
|            | 140 | 552.144 | 236.218 | 2.337 | 620.209 | 0.313    |

Table S4. The calculated bond number  $n$ , bond length  $d$ , Mulliken overlap population  $P$ , bond volume  $V_b$ , and Vickers hardness (GPa)  $H$  of  $\text{MgCNi}_3$  different phases at different pressures.

|                         | $n$ | $Bond$ | $d$  | $P$  | $V_b$ | $H_n$  | $H$    |
|-------------------------|-----|--------|------|------|-------|--------|--------|
| $Pm-3m$<br>(0 GPa)      | 3   | C-Ni   | 1.88 | 0.73 | 6.51  | 23.80  | 9.895  |
|                         | 1   | C-Mg   | 3.26 | 0.34 | 33.83 | 0.71   |        |
| $Cmc2_1$<br>(60 GPa)    | 2   | C-Ni   | 1.83 | 0.34 | 3.47  | 31.61  | 13.807 |
|                         | 4   | C-Ni   | 1.84 | 0.28 | 3.51  | 25.54  |        |
|                         | 4   | C-Ni   | 1.85 | 0.27 | 3.56  | 24.09  |        |
|                         | 2   | C-Ni   | 1.85 | 0.32 | 3.57  | 28.39  |        |
|                         | 2   | C-Mg   | 2.46 | 0.10 | 8.44  | 2.12   |        |
|                         | 2   | C-Mg   | 2.83 | 0.18 | 12.79 | 1.90   |        |
| $P4_2/mnm$<br>(120 GPa) | 2   | C-C    | 1.42 | 0.98 | 0.89  | 874.09 | 18.813 |
|                         | 8   | C-Ni   | 1.87 | 0.22 | 2.07  | 48.52  |        |
|                         | 4   | C-Ni   | 1.90 | 1.04 | 2.16  | 213.00 |        |
|                         | 4   | C-Mg   | 2.80 | 0.07 | 6.90  | 2.07   |        |
|                         | 8   | C-Ni   | 2.89 | 0.15 | 7.64  | 3.75   |        |
|                         | 4   | C-Ni   | 2.95 | 0.37 | 8.09  | 8.39   |        |
